# Supplementary material
Source: MDPI journal article supplement (https://www.mdpi.com/2073-4344/13/1/178)
Supplement: s1 [file s1]

## Supplementary Information

# Multifunctional Hybrid Nanozymes for Magnetic Enrichment and Bioelectrocatalytic Sensing of Circulating Tumor RNA during Minimal Residual Disease Monitoring

Kevin M. Koo <sup>1,2</sup>

<sup>1</sup> The University of Queensland Centre for Clinical Research (UQCCR), Brisbane, QLD 4029, Australia; maisheng.koo@uqconnect.edu.au

<sup>2</sup> XING Applied Research & Assay Development (XARAD) Division, XING Technologies Pty. Ltd., Brisbane, QLD 4073, Australia

**Table S1** Primer sequences.

| Oligos                     | 5'-Sequence-3'              |
|----------------------------|-----------------------------|
| T2:ERG Forward Primer      | Bio-C6-CGGCAGGAAGCCTTATCA   |
| T2:ERG Reverse Primer      | GTTACATTCCATTTTGAT          |
| <i>PCA3</i> Forward Primer | Bio-C6-CCTGATGATACAGAGGTGAG |
| <i>PCA3</i> Reverse Primer | GCACAGGGCGAGGCTCATCG        |
| <i>KLK2</i> Forward Primer | Bio-C6-GGGGGTCCACTTGTCTGTAA |
| <i>KLK2</i> Reverse Primer | GGTGAGTTCCAAGCTTCAGG        |

**Key:** Bio-C6-, Biotin modification with 6-carbon spacer.

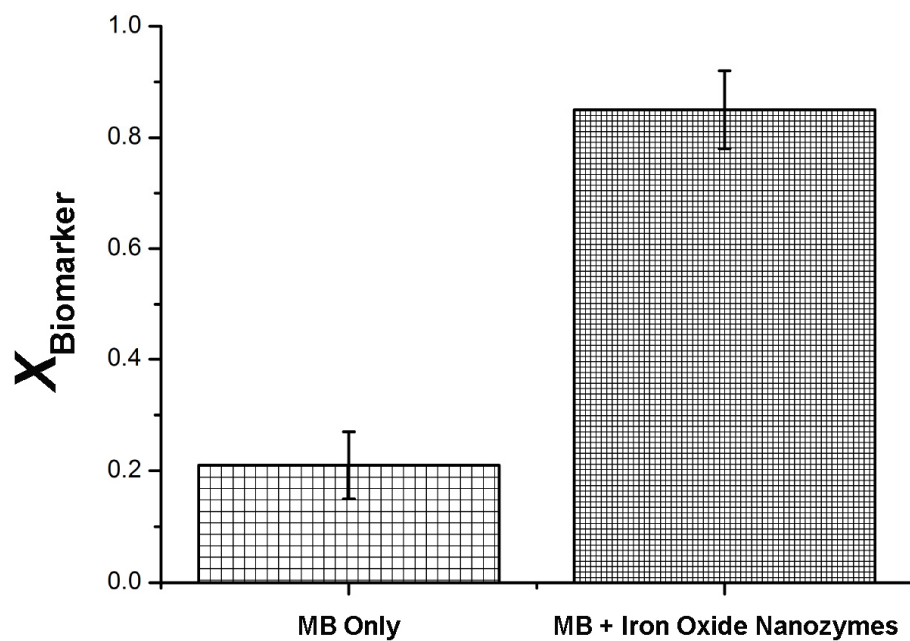

**Figure S1.** Current measurements using only DNA-intercalating methylene blue (MB) or dual DNA-intercalating MB/iron oxide nanozymes bioelectrocatalytic cycling. Error bars represent standard deviations of three technical replicates.

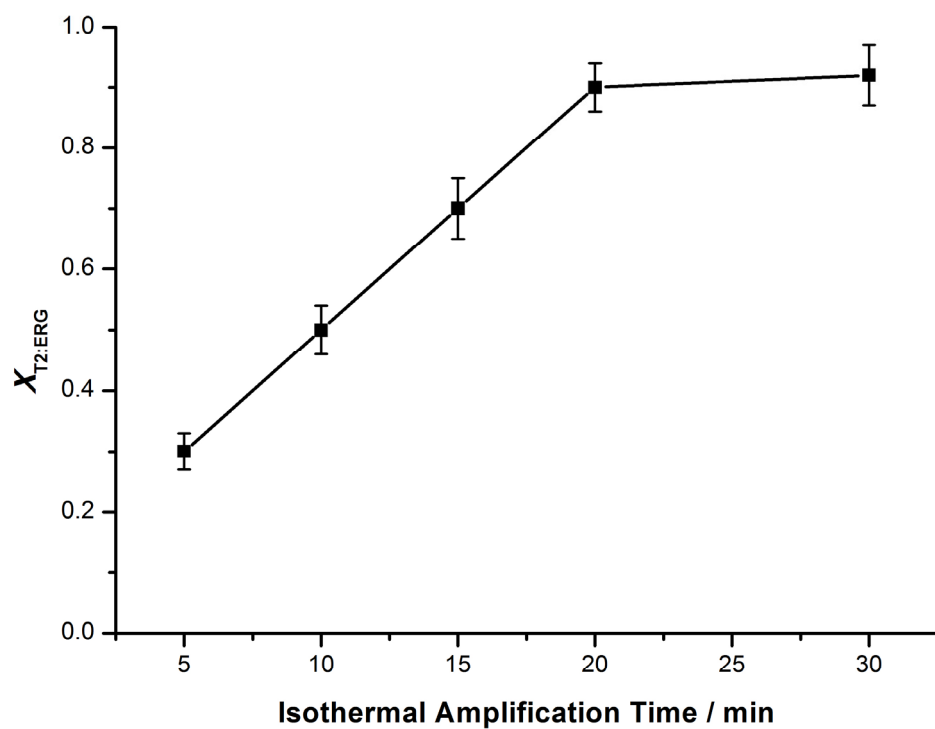

**Figure S2.** Optimization of isothermal amplification times (5, 10, 15, 20, and 30 min). Error bars represent standard deviations of three technical replicates.

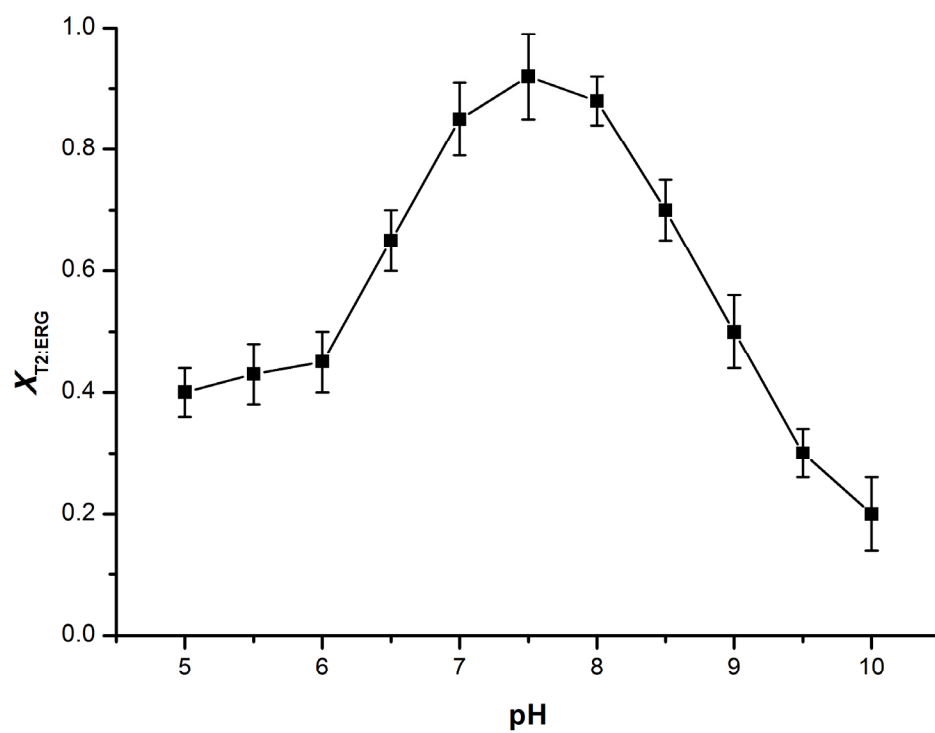

**Figure S3.** Optimization of electrolyte buffer pH 5.0 – 10.0. Error bars represent standard deviations of three technical replicates.

**Table S2.** Validation of detection outcomes of assay against gold standard quantitative polymerase chain reaction (qPCR).

| Contrived Urine<br>Samples with<br>Cell Line Input | Our Assay            |                      | Gold Standard qPCR Analysis                  |                      |
|----------------------------------------------------|----------------------|----------------------|----------------------------------------------|----------------------|
|                                                    | Normalized<br>Signal | Detection<br>Outcome | qPCR Cycle<br>Threshold<br>(C <sub>t</sub> ) | Detection<br>Outcome |
| <b>DuCap</b><br>T2:ERG                             | 0.90                 | Positive             | 15                                           | Positive             |
| <b>DuCap</b><br><i>PCA3</i>                        | 0.02                 | Negative             | 40                                           | Negative             |
| <b>DuCap</b><br><i>KLK2</i>                        | 0.70                 | Positive             | 23                                           | Positive             |
| <b>LnCap</b><br>T2:ERG                             | 0.01                 | Negative             | 40                                           | Negative             |
| <b>LnCap</b><br><i>PCA3</i>                        | 0.78                 | Positive             | 18                                           | Positive             |
| <b>LnCap</b><br><i>KLK2</i>                        | 0.63                 | Positive             | 25                                           | Positive             |
| <b>22Rv1</b><br>T2:ERG                             | 0.03                 | Negative             | 40                                           | Negative             |
| <b>22Rv1</b><br><i>PCA3</i>                        | 0.45                 | Positive             | 28                                           | Positive             |
| <b>22Rv1</b><br><i>KLK2</i>                        | 0.78                 | Positive             | 18                                           | Positive             |
